# Supplementary material for: Development and evaluation of a patient-reported outcome measure specific for Gaucher disease with or without neurological symptoms in Japan
Source: PubMed Central journal article supplement (PMC10770997; doi:10.1186/s13023-023-02996-9), 2024-01-05
Supplement: 13023_2023_2996_MOESM1_ESM.pdf [file 13023_2023_2996_MOESM1_ESM.pdf]

**Additional file 1: Table S1** Topics covered by PROM items in English. Parts 1 and 2 were from the previously published PROM for GD1 (Elstein D, et al. Orphanet J Rare Dis. 2022;17:9), whereas Part 3 was newly developed

| Item   | Topic                                               |
|--------|-----------------------------------------------------|
| Part 1 | Over the past month:                                |
| P1-1   | restricted education/job                            |
| P1-2   | restricted activities with friends                  |
| P1-3   | restricted intimate relationships                   |
| P1-4   | restricted hobbies/leisure activities               |
| P1-5   | concerned about emotional burden to others          |
| P1-6   | concerned about risk of bone disease                |
| P1-7   | concerned about risk of cancers                     |
| P1-8   | concerned about risk of Parkinson's disease         |
| P1-9   | concerned about financial burden                    |
| P1-10  | concerned that budget may affect therapy            |
| P1-11  | concerned about access to expert physician          |
| P1-12  | non-GD problems compared with GD problems           |
| P1-13  | general health improvement because of GD medication |
| P1-14  | all medical concerns were GD related                |
| P1-15  | current medication treated GD-related concerns      |
| Part 2 | Over the past week:                                 |
| P2-1   | GD-related dependence on others                     |
| P2-2   | GD-related abdomen swelling                         |
| P2-3   | GD-related fatigue                                  |
| P2-4   | GD-related physical weakness                        |
| P2-5   | GD-related bone pain                                |
| P2-6   | GD-related depression                               |

- P2-7 GD-related worries
- P2-8 future with GD
- P2-9 satisfaction with GD medication

---

Part 3 Over the past week:

---

- P3-1 difficulty hearing
- P3-2 difficulty seeing
- P3-3 difficulty swallowing food
- P3-4 difficulty speaking
- P3-5 involuntary movement or difficulty moving your arms or legs
- P3-6 epileptic seizures interfering with daily life
- P3-7 pain in the body
- P3-8 feel anxious about above symptoms (No. 1-7)
- P3-9 memory loss
- P3-10 difficulty exercising, studying, or working compared with other persons
- P3-11 feel anxious about continuing GD treatment
- P3-12 feel worried or nervous about going out

---

Up to this point:

---

- P3-13 felt physically tired after visiting the hospital or treatment
- P3-14 felt lack of understanding of GD by public service office
- P3-15 lack of social support
- P3-16 participation in GD patient support group

---

GD: Gaucher disease; GD1: type 1 GD; PROM: patient-reported outcome measure
