# Supplementary material for: Development and evaluation of a patient-reported outcome measure specific for Gaucher disease with or without neurological symptoms in Japan
Source: PubMed Central journal article supplement (PMC10770997; doi:10.1186/s13023-023-02996-9), 2024-01-05
Supplement: 13023_2023_2996_MOESM2_ESM.pdf [file 13023_2023_2996_MOESM2_ESM.pdf]

**Additional file 2: Table S2** Topics covered by PROM items in Japanese. Parts 1 and 2 were translated into Japanese from the previously published PROM for GD1 (Elstein D, et al. Orphanet J Rare Dis. 2022;17:9), whereas Part 3 was newly developed

| Item   | 質問項目                |
|--------|---------------------|
| Part 1 | 過去 1 ヶ月の下記の程度を問う質問： |
| P1-1   | 学業・仕事の制限            |
| P1-2   | 友人付き合いの制限           |
| P1-3   | 配偶者・パートナーとの関係の制限    |
| P1-4   | 趣味や余暇活動の制限          |
| P1-5   | 他者の精神的な負担になる心配      |
| P1-6   | 骨症状の心配              |
| P1-7   | 癌のリスクの心配            |
| P1-8   | パーキンソン病のリスクの心配      |
| P1-9   | 経済的負担の心配            |
| P1-10  | 最良の治療が受けられない心配      |
| P1-11  | 専門医への相談についての心配      |
| P1-12  | GD 以外の心配            |
| P1-13  | 治療薬による健康状態の改善       |
| P1-14  | 健康上の懸念と GD          |
| P1-15  | 治療薬と症状の管理           |
| Part 2 | 過去 1 週間の下記の程度を問う質問： |
| P2-1   | 他者からの支援             |
| P2-2   | 腹部症状                |
| P2-3   | 疲労感                 |

- P2-4 体力の衰え  
P2-5 骨の痛み  
P2-6 気分の落ち込み  
P2-7 疾患についての悩み  
P2-8 将来について  
P2-9 薬物療法への満足

Part 3 過去 1 週間の下記の程度を問う質問 :

- P3-1 耳の聞こえにくさ  
P3-2 目の見えにくさ  
P3-3 食事の飲み込みにくさ  
P3-4 しゃべりにくさ  
P3-5 手足の動かしにくさ  
P3-6 てんかんの発作  
P3-7 体の痛み  
P3-8 1~7に挙げたような症状に対する不安  
P3-9 物忘れ  
P3-10 運動や学習・仕事での難しさ  
P3-11 治療の継続についての不安  
P3-12 外出への不安

これまでの下記の程度を問う質問 :

- P3-13 通院による体の疲れ  
P3-14 行政サービスの窓口の担当者の理解不足  
P3-15 社会支援の不足  
P3-16 患者会での情報交換
