# Supplementary material for: Development and evaluation of a patient-reported outcome measure specific for Gaucher disease with or without neurological symptoms in Japan
Source: PubMed Central journal article supplement (PMC10770997; doi:10.1186/s13023-023-02996-9), 2024-01-05
Supplement: 13023_2023_2996_MOESM3_ESM.pdf [file 13023_2023_2996_MOESM3_ESM.pdf]

**Additional file 3: Table S3** PROM scores for individual items

| Item <sup>a</sup>       | Pre-test     |              |              |                   | Main analysis |               |               |                   |
|-------------------------|--------------|--------------|--------------|-------------------|---------------|---------------|---------------|-------------------|
|                         | GD1<br>(N=3) | GD2<br>(N=6) | GD3<br>(N=7) | Overall<br>(N=16) | GD1<br>(N=9)  | GD2<br>(N=13) | GD3<br>(N=11) | Overall<br>(N=33) |
| <b>Part 1</b>           |              |              |              |                   |               |               |               |                   |
| P1-1                    |              |              |              |                   |               |               |               |                   |
| Mean (SD)               | 0.833 (1.44) | 5.63 (5.15)  | 4.58 (4.31)  | 4.04 (4.27)       | 1.67 (2.80)   | 4.50 (3.07)   | 4.38 (4.38)   | 3.52 (3.55)       |
| Median                  | 0            | 6.25         | 2.50         | 2.50              | 0             | 5.00          | 3.75          | 2.50              |
| (min, max)              | (0, 2.50)    | (0, 10.0)    | (0, 10.0)    | (0, 10.0)         | (0, 7.50)     | (0, 10.0)     | (0, 10.0)     | (0, 10.0)         |
| Not collected,<br>n (%) | 0 (0)        | 2 (33.3)     | 1 (14.3)     | 3 (18.8)          | 0 (0)         | 3 (23.1)      | 3 (27.3)      | 6 (18.2)          |
| P1-2                    |              |              |              |                   |               |               |               |                   |
| Mean (SD)               | 0 (0)        | 3.13 (3.75)  | 4.29 (5.35)  | 3.04 (4.40)       | 0.556 (1.67)  | 3.64 (4.52)   | 2.50 (3.12)   | 2.33 (3.53)       |
| Median                  | 0            | 2.50         | 0            | 0                 | 0             | 0             | 2.50          | 0                 |
| (min, max)              | (0, 0)       | (0, 7.50)    | (0, 10.0)    | (0, 10.0)         | (0, 5.00)     | (0, 10.0)     | (0, 10.0)     | (0, 10.0)         |

| Item <sup>a</sup>       | Pre-test     |             |             |              | Main analysis |             |             |             |
|-------------------------|--------------|-------------|-------------|--------------|---------------|-------------|-------------|-------------|
|                         | GD1          | GD2         | GD3         | Overall      | GD1           | GD2         | GD3         | Overall     |
|                         | (N=3)        | (N=6)       | (N=7)       | (N=16)       | (N=9)         | (N=13)      | (N=11)      | (N=33)      |
| Not collected,<br>n (%) | 0 (0)        | 2 (33.3)    | 0 (0)       | 2 (12.5)     | 0 (0)         | 2 (15.4)    | 1 (9.1)     | 3 (9.1)     |
| P1-3                    |              |             |             |              |               |             |             |             |
| Mean (SD)               | 0 (NA)       | 0 (0)       | 1.25 (2.50) | 0.625 (1.77) | 1.67 (4.08)   | 0 (0)       | 1.50 (2.24) | 1.17 (2.81) |
| Median                  | 0            | 0           | 0           | 0            | 0             | 0           | 0           | 0           |
| (min, max)              | (0, 0)       | (0, 0)      | (0, 5.00)   | (0, 5.00)    | (0, 10.0)     | (0, 0)      | (0, 5.00)   | (0, 10.0)   |
| Not collected,<br>n (%) | 2 (66.7)     | 3 (50.0)    | 3 (42.9)    | 8 (50.0)     | 3 (33.3)      | 9 (69.2)    | 6 (54.5)    | 18 (54.5)   |
| P1-4                    |              |             |             |              |               |             |             |             |
| Mean (SD)               | 0.833 (1.44) | 5.63 (5.15) | 3.93 (4.53) | 3.75 (4.36)  | 0.833 (2.50)  | 3.25 (4.09) | 3.86 (4.38) | 2.75 (3.90) |
| Median                  | 0            | 6.25        | 2.50        | 2.50         | 0             | 1.25        | 2.50        | 0           |
| (min, max)              | (0, 2.50)    | (0, 10.0)   | (0, 10.0)   | (0, 10.0)    | (0, 7.50)     | (0, 10.0)   | (0, 10.0)   | (0, 10.0)   |

| Item <sup>a</sup>       | Pre-test     |              |             |             | Main analysis |             |             |             |
|-------------------------|--------------|--------------|-------------|-------------|---------------|-------------|-------------|-------------|
|                         | GD1          | GD2          | GD3         | Overall     | GD1           | GD2         | GD3         | Overall     |
|                         | (N=3)        | (N=6)        | (N=7)       | (N=16)      | (N=9)         | (N=13)      | (N=11)      | (N=33)      |
| Not collected,<br>n (%) | 0 (0)        | 2 (33.3)     | 0 (0)       | 2 (12.5)    | 0 (0)         | 3 (23.1)    | 0 (0)       | 3 (9.1)     |
| P1-5                    |              |              |             |             |               |             |             |             |
| Mean (SD)               | 0 (0)        | 1.25 (1.77)  | 2.92 (4.01) | 1.82 (3.18) | 0.833 (1.77)  | 1.67 (2.50) | 3.41 (3.22) | 2.07 (2.76) |
| Median                  | 0            | 1.25         | 1.25        | 0           | 0             | 0           | 2.50        | 0           |
| (min, max)              | (0, 0)       | (0, 2.50)    | (0, 10.0)   | (0, 10.0)   | (0, 5.00)     | (0, 7.50)   | (0, 10.0)   | (0, 10.0)   |
| Not collected,<br>n (%) | 0 (0)        | 4 (66.7)     | 1 (14.3)    | 5 (31.3)    | 0 (0)         | 4 (30.8)    | 0 (0)       | 4 (12.1)    |
| P1-6                    |              |              |             |             |               |             |             |             |
| Mean (SD)               | 6.67 (2.89)  | 6.25 (3.23)  | 4.29 (3.13) | 5.36 (3.08) | 6.94 (3.91)   | 4.32 (3.37) | 3.64 (3.23) | 4.84 (3.65) |
| Median                  | 5.00         | 6.25         | 5.00        | 5.00        | 10.0          | 5.00        | 2.50        | 5.00        |
| (min, max)              | (5.00, 10.0) | (2.50, 10.0) | (0, 10.0)   | (0, 10.0)   | (0, 10.0)     | (0, 10.0)   | (0, 10.0)   | (0, 10.0)   |

| Item <sup>a</sup>       | Pre-test     |              |              |             | Main analysis |              |             |             |
|-------------------------|--------------|--------------|--------------|-------------|---------------|--------------|-------------|-------------|
|                         | GD1          | GD2          | GD3          | Overall     | GD1           | GD2          | GD3         | Overall     |
|                         | (N=3)        | (N=6)        | (N=7)        | (N=16)      | (N=9)         | (N=13)       | (N=11)      | (N=33)      |
| Not collected,<br>n (%) | 0 (0)        | 2 (33.3)     | 0 (0)        | 2 (12.5)    | 0 (0)         | 2 (15.4)     | 0 (0)       | 2 (6.1)     |
| P1-7                    |              |              |              |             |               |              |             |             |
| Mean (SD)               | 5.00 (NA)    | 0.833 (1.44) | 0.714 (1.89) | 1.14 (2.05) | 1.11 (2.20)   | 0.833 (2.50) | 2.00 (3.07) | 1.34 (2.59) |
| Median                  | 5.00         | 0            | 0            | 0           | 0             | 0            | 1.25        | 0           |
| (min, max)              | (5.00, 5.00) | (0, 2.50)    | (0, 5.00)    | (0, 5.00)   | (0, 5.00)     | (0, 7.50)    | (0, 10.0)   | (0, 10.0)   |
| Not collected,<br>n (%) | 2 (66.7)     | 3 (50.0)     | 0 (0)        | 5 (31.3)    | 0 (0)         | 4 (30.8)     | 1 (9.1)     | 5 (15.2)    |
| P1-8                    |              |              |              |             |               |              |             |             |
| Mean (SD)               | 5.00 (7.07)  | 1.25 (1.44)  | 2.14 (2.25)  | 2.31 (2.97) | 2.78 (4.41)   | 2.50 (3.75)  | 2.75 (3.62) | 2.68 (3.78) |
| Median                  | 5.00         | 1.25         | 2.50         | 2.50        | 0             | 0            | 1.25        | 0           |
| (min, max)              | (0, 10.0)    | (0, 2.50)    | (0, 5.00)    | (0, 10.0)   | (0, 10.0)     | (0, 10.0)    | (0, 10.0)   | (0, 10.0)   |

| Item <sup>a</sup>       | Pre-test     |             |             |             | Main analysis |              |             |             |
|-------------------------|--------------|-------------|-------------|-------------|---------------|--------------|-------------|-------------|
|                         | GD1          | GD2         | GD3         | Overall     | GD1           | GD2          | GD3         | Overall     |
|                         | (N=3)        | (N=6)       | (N=7)       | (N=16)      | (N=9)         | (N=13)       | (N=11)      | (N=33)      |
| Not collected,<br>n (%) | 1 (33.3)     | 2 (33.3)    | 0 (0)       | 3 (18.8)    | 0 (0)         | 4 (30.8)     | 1 (9.1)     | 5 (15.2)    |
| P1-9                    |              |             |             |             |               |              |             |             |
| Mean (SD)               | 5.00 (0)     | 3.33 (5.77) | 2.86 (2.25) | 3.33 (3.08) | 2.50 (3.06)   | 0.714 (1.89) | 3.61 (3.33) | 2.40 (3.02) |
| Median                  | 5.00         | 0           | 2.50        | 3.75        | 0             | 0            | 5.00        | 0           |
| (min, max)              | (5.00, 5.00) | (0, 10.0)   | (0, 5.00)   | (0, 10.0)   | (0, 7.50)     | (0, 5.00)    | (0, 10.0)   | (0, 10.0)   |
| Not collected,<br>n (%) | 1 (33.3)     | 3 (50.0)    | 0 (0)       | 4 (25.0)    | 0 (0)         | 6 (46.2)     | 2 (18.2)    | 8 (24.2)    |
| P1-10                   |              |             |             |             |               |              |             |             |
| Mean (SD)               | 0 (NA)       | 0 (0)       | 1.79 (1.89) | 1.04 (1.67) | 1.39 (1.82)   | 0.682 (1.62) | 1.67 (3.31) | 1.21 (2.28) |
| Median                  | 0            | 0           | 2.50        | 0           | 0             | 0            | 0           | 0           |
| (min, max)              | (0, 0)       | (0, 0)      | (0, 5.00)   | (0, 5.00)   | (0, 5.00)     | (0, 5.00)    | (0, 10.0)   | (0, 10.0)   |

| Item <sup>a</sup>       | Pre-test     |             |             |             | Main analysis |              |             |             |
|-------------------------|--------------|-------------|-------------|-------------|---------------|--------------|-------------|-------------|
|                         | GD1          | GD2         | GD3         | Overall     | GD1           | GD2          | GD3         | Overall     |
|                         | (N=3)        | (N=6)       | (N=7)       | (N=16)      | (N=9)         | (N=13)       | (N=11)      | (N=33)      |
| Not collected,<br>n (%) | 2 (66.7)     | 2 (33.3)    | 0 (0)       | 4 (25.0)    | 0 (0)         | 2 (15.4)     | 2 (18.2)    | 4 (12.1)    |
| P1-11                   |              |             |             |             |               |              |             |             |
| Mean (SD)               | 2.50 (3.54)  | 2.50 (2.89) | 1.79 (2.38) | 2.12 (2.47) | 1.11 (2.20)   | 0.682 (1.62) | 2.50 (4.03) | 1.45 (2.87) |
| Median                  | 2.50         | 2.50        | 0           | 0           | 0             | 0            | 0           | 0           |
| (min, max)              | (0, 5.00)    | (0, 5.00)   | (0, 5.00)   | (0, 5.00)   | (0, 5.00)     | (0, 5.00)    | (0, 10.0)   | (0, 10.0)   |
| Not collected,<br>n (%) | 1 (33.3)     | 2 (33.3)    | 0 (0)       | 3 (18.8)    | 0 (0)         | 2 (15.4)     | 0 (0)       | 2 (6.1)     |
| P1-12                   |              |             |             |             |               |              |             |             |
| Mean (SD)               | 10.0 (0)     | 1.88 (3.75) | 2.14 (2.67) | 3.27 (4.00) | 5.31 (4.32)   | 2.78 (3.84)  | 4.77 (3.25) | 4.29 (3.78) |
| Median                  | 10.0         | 0           | 0           | 0           | 5.00          | 0            | 5.00        | 5.00        |
| (min, max)              | (10.0, 10.0) | (0, 7.50)   | (0, 5.00)   | (0, 10.0)   | (0, 10.0)     | (0, 10.0)    | (0, 10.0)   | (0, 10.0)   |

| Item <sup>a</sup>       | Pre-test     |              |             |             | Main analysis |             |              |             |
|-------------------------|--------------|--------------|-------------|-------------|---------------|-------------|--------------|-------------|
|                         | GD1          | GD2          | GD3         | Overall     | GD1           | GD2         | GD3          | Overall     |
|                         | (N=3)        | (N=6)        | (N=7)       | (N=16)      | (N=9)         | (N=13)      | (N=11)       | (N=33)      |
| Not collected,<br>n (%) | 1 (33.3)     | 2 (33.3)     | 0 (0)       | 3 (18.8)    | 1 (11.1)      | 4 (30.8)    | 0 (0)        | 5 (15.2)    |
| P1-13                   |              |              |             |             |               |             |              |             |
| Mean (SD)               | 4.17 (1.44)  | 4.00 (2.85)  | 3.21 (2.38) | 3.67 (2.29) | 2.50 (2.50)   | 3.46 (2.61) | 4.32 (2.52)  | 3.48 (2.57) |
| Median                  | 5.00         | 5.00         | 2.50        | 2.50        | 2.50          | 2.50        | 2.50         | 2.50        |
| (min, max)              | (2.50, 5.00) | (0, 7.50)    | (0, 7.50)   | (0, 7.50)   | (0, 5.00)     | (0, 7.50)   | (2.50, 10.0) | (0, 10.0)   |
| Not collected,<br>n (%) | 0 (0)        | 1 (16.7)     | 0 (0)       | 1 (6.3)     | 0 (0)         | 0 (0)       | 0 (0)        | 0 (0)       |
| P1-14                   |              |              |             |             |               |             |              |             |
| Mean (SD)               | 4.17 (1.44)  | 9.00 (2.24)  | 4.64 (3.36) | 6.00 (3.38) | 4.44 (2.08)   | 6.54 (2.98) | 4.09 (2.02)  | 5.15 (2.65) |
| Median                  | 5.00         | 10.0         | 5.00        | 5.00        | 5.00          | 5.00        | 5.00         | 5.00        |
| (min, max)              | (2.50, 5.00) | (5.00, 10.0) | (0, 10.0)   | (0, 10.0)   | (0, 7.50)     | (0, 10.0)   | (0, 7.50)    | (0, 10.0)   |

| Item <sup>a</sup>       | Pre-test     |              |             |             | Main analysis |              |             |             |
|-------------------------|--------------|--------------|-------------|-------------|---------------|--------------|-------------|-------------|
|                         | GD1          | GD2          | GD3         | Overall     | GD1           | GD2          | GD3         | Overall     |
|                         | (N=3)        | (N=6)        | (N=7)       | (N=16)      | (N=9)         | (N=13)       | (N=11)      | (N=33)      |
| Not collected,<br>n (%) | 0 (0)        | 1 (16.7)     | 0 (0)       | 1 (6.3)     | 0 (0)         | 0 (0)        | 0 (0)       | 0 (0)       |
| <b>P1-15</b>            |              |              |             |             |               |              |             |             |
| Mean (SD)               | 3.33 (1.44)  | 4.50 (3.26)  | 2.86 (2.25) | 3.50 (2.46) | 1.67 (1.25)   | 2.50 (2.28)  | 4.09 (3.02) | 2.80 (2.48) |
| Median                  | 2.50         | 5.00         | 2.50        | 2.50        | 2.50          | 2.50         | 5.00        | 2.50        |
| (min, max)              | (2.50, 5.00) | (0, 7.50)    | (0, 7.50)   | (0, 7.50)   | (0, 2.50)     | (0, 7.50)    | (0, 10.0)   | (0, 10.0)   |
| Not collected,<br>n (%) | 0 (0)        | 1 (16.7)     | 0 (0)       | 1 (6.3)     | 0 (0)         | 0 (0)        | 0 (0)       | 0 (0)       |
| <b>Part 2</b>           |              |              |             |             |               |              |             |             |
| <b>P2-1</b>             |              |              |             |             |               |              |             |             |
| Mean (SD)               | 0 (0)        | 10.0 (0)     | 4.43 (4.24) | 5.69 (4.67) | 0.889 (1.36)  | 8.92 (2.29)  | 4.09 (3.73) | 5.12 (4.25) |
| Median                  | 0            | 10.0         | 2.00        | 8.00        | 0             | 10.0         | 4.00        | 4.00        |
| (min, max)              | (0, 0)       | (10.0, 10.0) | (0, 10.0)   | (0, 10.0)   | (0, 3.00)     | (3.00, 10.0) | (0, 10.0)   | (0, 10.0)   |



| Item <sup>a</sup>       | Pre-test     |              |             |             | Main analysis |             |             |             |
|-------------------------|--------------|--------------|-------------|-------------|---------------|-------------|-------------|-------------|
|                         | GD1          | GD2          | GD3         | Overall     | GD1           | GD2         | GD3         | Overall     |
|                         | (N=3)        | (N=6)        | (N=7)       | (N=16)      | (N=9)         | (N=13)      | (N=11)      | (N=33)      |
| Not collected,<br>n (%) | 0 (0)        | 0 (0)        | 0 (0)       | 0 (0)       | 0 (0)         | 0 (0)       | 0 (0)       | 0 (0)       |
| P2-2                    |              |              |             |             |               |             |             |             |
| Mean (SD)               | 0 (0)        | 1.20 (2.68)  | 2.43 (4.16) | 1.53 (3.23) | 0.125 (0.354) | 1.23 (2.62) | 1.45 (1.81) | 1.03 (2.01) |
| Median                  | 0            | 0            | 0           | 0           | 0             | 0           | 0           | 0           |
| (min, max)              | (0, 0)       | (0, 6.00)    | (0, 9.00)   | (0, 9.00)   | (0, 1.00)     | (0, 8.00)   | (0, 5.00)   | (0, 8.00)   |
| Not collected,<br>n (%) | 0 (0)        | 1 (16.7)     | 0 (0)       | 1 (6.3)     | 1 (11.1)      | 0 (0)       | 0 (0)       | 1 (3.0)     |
| P2-3                    |              |              |             |             |               |             |             |             |
| Mean (SD)               | 4.33 (1.15)  | 7.50 (3.79)  | 2.86 (2.19) | 4.50 (3.16) | 3.22 (1.86)   | 6.08 (3.25) | 3.82 (3.79) | 4.55 (3.31) |
| Median                  | 5.00         | 9.00         | 2.00        | 4.50        | 3.00          | 7.00        | 2.00        | 5.00        |
| (min, max)              | (3.00, 5.00) | (2.00, 10.0) | (0, 6.00)   | (0, 10.0)   | (0, 5.00)     | (0, 10.0)   | (0, 10.0)   | (0, 10.0)   |

| Item <sup>a</sup>       | Pre-test     |             |              |             | Main analysis |             |             |             |
|-------------------------|--------------|-------------|--------------|-------------|---------------|-------------|-------------|-------------|
|                         | GD1          | GD2         | GD3          | Overall     | GD1           | GD2         | GD3         | Overall     |
|                         | (N=3)        | (N=6)       | (N=7)        | (N=16)      | (N=9)         | (N=13)      | (N=11)      | (N=33)      |
| Not collected,<br>n (%) | 0 (0)        | 2 (33.3)    | 0 (0)        | 2 (12.5)    | 0 (0)         | 0 (0)       | 0 (0)       | 0 (0)       |
| P2-4                    |              |             |              |             |               |             |             |             |
| Mean (SD)               | 4.00 (1.73)  | 4.25 (2.99) | 3.00 (3.79)  | 3.57 (3.08) | 2.44 (1.88)   | 4.69 (3.66) | 4.27 (3.58) | 3.94 (3.29) |
| Median                  | 5.00         | 5.00        | 2.00         | 4.00        | 3.00          | 5.00        | 4.00        | 3.00        |
| (min, max)              | (2.00, 5.00) | (0, 7.00)   | (0, 10.0)    | (0, 10.0)   | (0, 5.00)     | (0, 10.0)   | (0, 10.0)   | (0, 10.0)   |
| Not collected,<br>n (%) | 0 (0)        | 2 (33.3)    | 0 (0)        | 2 (12.5)    | 0 (0)         | 0 (0)       | 0 (0)       | 0 (0)       |
| P2-5                    |              |             |              |             |               |             |             |             |
| Mean (SD)               | 2.67 (3.06)  | 3.25 (4.72) | 0.571 (1.13) | 1.79 (2.97) | 4.11 (3.14)   | 2.85 (3.36) | 1.55 (2.02) | 2.76 (3.00) |
| Median                  | 2.00         | 1.50        | 0            | 0           | 3.00          | 0           | 1.00        | 2.00        |
| (min, max)              | (0, 6.00)    | (0, 10.0)   | (0, 3.00)    | (0, 10.0)   | (0, 8.00)     | (0, 9.00)   | (0, 6.00)   | (0, 9.00)   |

| Item <sup>a</sup>       | Pre-test    |             |             |             | Main analysis |             |             |             |
|-------------------------|-------------|-------------|-------------|-------------|---------------|-------------|-------------|-------------|
|                         | GD1         | GD2         | GD3         | Overall     | GD1           | GD2         | GD3         | Overall     |
|                         | (N=3)       | (N=6)       | (N=7)       | (N=16)      | (N=9)         | (N=13)      | (N=11)      | (N=33)      |
| Not collected,<br>n (%) | 0 (0)       | 2 (33.3)    | 0 (0)       | 2 (12.5)    | 0 (0)         | 0 (0)       | 0 (0)       | 0 (0)       |
| P2-6                    |             |             |             |             |               |             |             |             |
| Mean (SD)               | 0 (0)       | 5.00 (3.56) | 1.00 (1.26) | 2.00 (2.89) | 1.67 (1.87)   | 4.85 (3.41) | 3.09 (2.51) | 3.39 (2.99) |
| Median                  | 0           | 6.00        | 0.500       | 0           | 1.00          | 5.00        | 2.00        | 3.00        |
| (min, max)              | (0, 0)      | (0, 8.00)   | (0, 3.00)   | (0, 8.00)   | (0, 5.00)     | (0, 10.0)   | (0, 6.00)   | (0, 10.0)   |
| Not collected,<br>n (%) | 0 (0)       | 2 (33.3)    | 1 (14.3)    | 3 (18.8)    | 0 (0)         | 0 (0)       | 0 (0)       | 0 (0)       |
| P2-7                    |             |             |             |             |               |             |             |             |
| Mean (SD)               | 2.00 (2.65) | 5.75 (4.35) | 2.43 (3.64) | 3.29 (3.77) | 2.11 (2.37)   | 3.77 (3.14) | 2.00 (3.10) | 2.73 (2.97) |
| Median                  | 1.00        | 6.50        | 1.00        | 1.50        | 1.00          | 5.00        | 0           | 1.00        |
| (min, max)              | (0, 5.00)   | (0, 10.0)   | (0, 10.0)   | (0, 10.0)   | (0, 5.00)     | (0, 10.0)   | (0, 8.00)   | (0, 10.0)   |

| Item <sup>a</sup>       | Pre-test         |             |             |             | Main analysis |             |             |             |
|-------------------------|------------------|-------------|-------------|-------------|---------------|-------------|-------------|-------------|
|                         | GD1              | GD2         | GD3         | Overall     | GD1           | GD2         | GD3         | Overall     |
|                         | (N=3)            | (N=6)       | (N=7)       | (N=16)      | (N=9)         | (N=13)      | (N=11)      | (N=33)      |
| Not collected,<br>n (%) | 0 (0)            | 2 (33.3)    | 0 (0)       | 2 (12.5)    | 0 (0)         | 0 (0)       | 0 (0)       | 0 (0)       |
| P2-8                    |                  |             |             |             |               |             |             |             |
| Mean (SD)               | 3.67 (2.31)      | 5.00 (4.08) | 2.86 (3.67) | 3.64 (3.43) | 2.78 (2.22)   | 3.77 (3.47) | 3.64 (3.41) | 3.45 (3.09) |
| Median                  | 5.00             | 5.00        | 2.00        | 4.00        | 2.00          | 4.00        | 2.00        | 3.00        |
| (min, max)              | (1.00, 5.00)     | (0, 10.0)   | (0, 10.0)   | (0, 10.0)   | (0, 5.00)     | (0, 10.0)   | (0, 9.00)   | (0, 10.0)   |
| Not collected,<br>n (%) | 0 (0)            | 2 (33.3)    | 0 (0)       | 2 (12.5)    | 0 (0)         | 0 (0)       | 0 (0)       | 0 (0)       |
| P2-9                    |                  |             |             |             |               |             |             |             |
| Mean (SD)               | 0.333<br>(0.577) | 3.80 (3.42) | 3.57 (3.31) | 3.00 (3.16) | 1.22 (1.72)   | 2.54 (3.38) | 2.55 (2.77) | 2.18 (2.79) |
| Median                  | 0                | 3.00        | 3.00        | 2.00        | 0             | 0           | 2.00        | 2.00        |
| (min, max)              | (0, 1.00)        | (0, 9.00)   | (0, 10.0)   | (0, 10.0)   | (0, 5.00)     | (0, 9.00)   | (0, 10.0)   | (0, 10.0)   |

| Item <sup>a</sup>       | Pre-test |          |       |         | Main analysis |        |        |         |
|-------------------------|----------|----------|-------|---------|---------------|--------|--------|---------|
|                         | GD1      | GD2      | GD3   | Overall | GD1           | GD2    | GD3    | Overall |
|                         | (N=3)    | (N=6)    | (N=7) | (N=16)  | (N=9)         | (N=13) | (N=11) | (N=33)  |
| Not collected,<br>n (%) | 0 (0)    | 1 (16.7) | 0 (0) | 1 (6.3) | 0 (0)         | 0 (0)  | 0 (0)  | 0 (0)   |

### Part 3

#### P3-1

|                         |         |             |             |             |             |             |             |             |
|-------------------------|---------|-------------|-------------|-------------|-------------|-------------|-------------|-------------|
| Mean (SD)               | NA      | 5.00 (4.08) | 1.57 (3.74) | 2.82 (4.05) | 2.33 (2.74) | 2.85 (2.91) | 2.45 (3.62) | 2.58 (3.03) |
| Median                  | NA      | 5.00        | 0           | 0           | 1.00        | 4.00        | 0           | 0           |
| (min, max)              |         | (0, 10.0)   | (0, 10.0)   | (0, 10.0)   | (0, 7.00)   | (0, 8.00)   | (0, 10.0)   | (0, 10.0)   |
| Not collected,<br>n (%) | 3 (100) | 2 (33.3)    | 0 (0)       | 5 (31.3)    | 0 (0)       | 0 (0)       | 0 (0)       | 0 (0)       |

#### P3-2

|            |    |             |              |             |             |             |             |             |
|------------|----|-------------|--------------|-------------|-------------|-------------|-------------|-------------|
| Mean (SD)  | NA | 6.75 (4.72) | 0.667 (1.21) | 3.10 (4.25) | 1.00 (1.66) | 3.77 (3.37) | 2.64 (2.84) | 2.64 (2.96) |
| Median     | NA | 8.50        | 0            | 0.500       | 0           | 5.00        | 2.00        | 2.00        |
| (min, max) |    | (0, 10.0)   | (0, 3.00)    | (0, 10.0)   | (0, 5.00)   | (0, 8.00)   | (0, 8.00)   | (0, 8.00)   |

| Item <sup>a</sup>       | Pre-test |             |             |             | Main analysis |             |             |             |
|-------------------------|----------|-------------|-------------|-------------|---------------|-------------|-------------|-------------|
|                         | GD1      | GD2         | GD3         | Overall     | GD1           | GD2         | GD3         | Overall     |
|                         | (N=3)    | (N=6)       | (N=7)       | (N=16)      | (N=9)         | (N=13)      | (N=11)      | (N=33)      |
| Not collected,<br>n (%) | 3 (100)  | 2 (33.3)    | 1 (14.3)    | 6 (37.5)    | 0 (0)         | 0 (0)       | 0 (0)       | 0 (0)       |
| P3-3 <sup>b</sup>       |          |             |             |             |               |             |             |             |
| Mean (SD)               | NA       | 7.50 (5.00) | 3.29 (4.64) | 4.82 (5.00) | 0 (0)         | 5.92 (4.79) | 2.45 (4.13) | 3.15 (4.47) |
| Median                  | NA       | 10.0        | 1.00        | 2.00        | 0             | 9.00        | 0           | 0           |
| (min, max)              |          | (0, 10.0)   | (0, 10.0)   | (0, 10.0)   | (0, 0)        | (0, 10.0)   | (0, 10.0)   | (0, 10.0)   |
| Not collected,<br>n (%) | 3 (100)  | 2 (33.3)    | 0 (0)       | 5 (31.3)    | 0 (0)         | 0 (0)       | 0 (0)       | 0 (0)       |
| P3-4 <sup>b</sup>       |          |             |             |             |               |             |             |             |
| Mean (SD)               | –        | –           | –           | –           | 0.111 (0.333) | 6.38 (4.65) | 2.55 (3.88) | 3.39 (4.44) |
| Median                  | –        | –           | –           | –           | 0             | 10.0        | 1.00        | 0           |
| (min, max)              |          |             |             |             | (0, 1.00)     | (0, 10.0)   | (0, 10.0)   | (0, 10.0)   |

| Item <sup>a</sup>       | Pre-test |              |             |             | Main analysis |             |             |             |
|-------------------------|----------|--------------|-------------|-------------|---------------|-------------|-------------|-------------|
|                         | GD1      | GD2          | GD3         | Overall     | GD1           | GD2         | GD3         | Overall     |
|                         | (N=3)    | (N=6)        | (N=7)       | (N=16)      | (N=9)         | (N=13)      | (N=11)      | (N=33)      |
| Not collected,<br>n (%) | –        | –            | –           | –           | 0 (0)         | 0 (0)       | 0 (0)       | 0 (0)       |
| P3-5                    |          |              |             |             |               |             |             |             |
| Mean (SD)               | NA       | 8.20 (3.49)  | 3.57 (4.54) | 5.50 (4.62) | 1.22 (1.99)   | 6.46 (4.43) | 2.91 (3.59) | 3.85 (4.17) |
| Median                  | NA       | 10.0         | 2.00        | 6.00        | 0             | 10.0        | 2.00        | 2.00        |
| (min, max)              |          | (2.00, 10.0) | (0, 10.0)   | (0, 10.0)   | (0, 5.00)     | (0, 10.0)   | (0, 10.0)   | (0, 10.0)   |
| Not collected,<br>n (%) | 3 (100)  | 1 (16.7)     | 0 (0)       | 4 (25.0)    | 0 (0)         | 0 (0)       | 0 (0)       | 0 (0)       |
| P3-6                    |          |              |             |             |               |             |             |             |
| Mean (SD)               | NA       | 7.50 (3.08)  | 2.14 (3.93) | 4.62 (4.41) | 0 (0)         | 5.38 (4.81) | 1.45 (3.21) | 2.69 (4.21) |
| Median                  | NA       | 8.50         | 0           | 5.00        | 0             | 8.00        | 0           | 0           |
| (min, max)              |          | (2.00, 10.0) | (0, 10.0)   | (0, 10.0)   | (0, 0)        | (0, 10.0)   | (0, 10.0)   | (0, 10.0)   |

| Item <sup>a</sup>       | Pre-test |              |              |             | Main analysis |             |             |             |
|-------------------------|----------|--------------|--------------|-------------|---------------|-------------|-------------|-------------|
|                         | GD1      | GD2          | GD3          | Overall     | GD1           | GD2         | GD3         | Overall     |
|                         | (N=3)    | (N=6)        | (N=7)        | (N=16)      | (N=9)         | (N=13)      | (N=11)      | (N=33)      |
| Not collected,<br>n (%) | 3 (100)  | 0 (0)        | 0 (0)        | 3 (18.8)    | 1 (11.1)      | 0 (0)       | 0 (0)       | 1 (3.0)     |
| P3-7                    |          |              |              |             |               |             |             |             |
| Mean (SD)               | NA       | 4.33 (4.04)  | 0.857 (1.07) | 1.90 (2.69) | 2.11 (2.93)   | 4.31 (3.82) | 1.64 (2.29) | 2.82 (3.28) |
| Median                  | NA       | 5.00         | 0            | 1.00        | 0             | 4.00        | 1.00        | 2.00        |
| (min, max)              |          | (0, 8.00)    | (0, 2.00)    | (0, 8.00)   | (0, 8.00)     | (0, 10.0)   | (0, 6.00)   | (0, 10.0)   |
| Not collected,<br>n (%) | 3 (100)  | 3 (50.0)     | 0 (0)        | 6 (37.5)    | 0 (0)         | 0 (0)       | 0 (0)       | 0 (0)       |
| P3-8                    |          |              |              |             |               |             |             |             |
| Mean (SD)               | NA       | 7.00 (2.45)  | 3.00 (3.51)  | 4.45 (3.64) | 1.44 (1.67)   | 5.15 (3.83) | 3.55 (3.98) | 3.61 (3.67) |
| Median                  | NA       | 6.50         | 1.00         | 5.00        | 2.00          | 5.00        | 1.00        | 2.00        |
| (min, max)              |          | (5.00, 10.0) | (0, 10.0)    | (0, 10.0)   | (0, 5.00)     | (0, 10.0)   | (0, 10.0)   | (0, 10.0)   |



| Item <sup>a</sup>       | Pre-test |              |             |             | Main analysis |             |             |             |
|-------------------------|----------|--------------|-------------|-------------|---------------|-------------|-------------|-------------|
|                         | GD1      | GD2          | GD3         | Overall     | GD1           | GD2         | GD3         | Overall     |
|                         | (N=3)    | (N=6)        | (N=7)       | (N=16)      | (N=9)         | (N=13)      | (N=11)      | (N=33)      |
| Not collected,<br>n (%) | 3 (100)  | 2 (33.3)     | 0 (0)       | 5 (31.3)    | 0 (0)         | 0 (0)       | 0 (0)       | 0 (0)       |
| P3-9                    |          |              |             |             |               |             |             |             |
| Mean (SD)               | NA       | 3.33 (2.89)  | 1.86 (2.85) | 2.30 (2.79) | 2.56 (1.81)   | 1.15 (2.19) | 3.55 (3.30) | 2.33 (2.67) |
| Median                  | NA       | 5.00         | 1.00        | 1.50        | 2.00          | 0           | 3.00        | 2.00        |
| (min, max)              |          | (0, 5.00)    | (0, 8.00)   | (0, 8.00)   | (0, 5.00)     | (0, 5.00)   | (0, 10.0)   | (0, 10.0)   |
| Not collected,<br>n (%) | 3 (100)  | 3 (50.0)     | 0 (0)       | 6 (37.5)    | 0 (0)         | 0 (0)       | 0 (0)       | 0 (0)       |
| P3-10                   |          |              |             |             |               |             |             |             |
| Mean (SD)               | NA       | 7.75 (2.63)  | 4.14 (4.38) | 5.45 (4.11) | 2.67 (3.43)   | 7.31 (3.92) | 3.82 (3.22) | 4.88 (4.01) |
| Median                  | NA       | 8.00         | 3.00        | 5.00        | 1.00          | 10.0        | 3.00        | 4.00        |
| (min, max)              |          | (5.00, 10.0) | (0, 10.0)   | (0, 10.0)   | (0, 10.0)     | (0, 10.0)   | (0, 10.0)   | (0, 10.0)   |

| Item <sup>a</sup>       | Pre-test |             |              |             | Main analysis |             |             |             |
|-------------------------|----------|-------------|--------------|-------------|---------------|-------------|-------------|-------------|
|                         | GD1      | GD2         | GD3          | Overall     | GD1           | GD2         | GD3         | Overall     |
|                         | (N=3)    | (N=6)       | (N=7)        | (N=16)      | (N=9)         | (N=13)      | (N=11)      | (N=33)      |
| Not collected,<br>n (%) | 3 (100)  | 2 (33.3)    | 0 (0)        | 5 (31.3)    | 0 (0)         | 0 (0)       | 0 (0)       | 0 (0)       |
| P3-11                   |          |             |              |             |               |             |             |             |
| Mean (SD)               | NA       | 3.40 (3.13) | 2.57 (3.60)  | 2.92 (3.29) | 1.11 (2.20)   | 2.08 (2.87) | 2.45 (3.39) | 1.94 (2.86) |
| Median                  | NA       | 5.00        | 2.00         | 2.00        | 0             | 0           | 1.00        | 0           |
| (min, max)              |          | (0, 6.00)   | (0, 10.0)    | (0, 10.0)   | (0, 5.00)     | (0, 8.00)   | (0, 10.0)   | (0, 10.0)   |
| Not collected,<br>n (%) | 3 (100)  | 1 (16.7)    | 0 (0)        | 4 (25.0)    | 0 (0)         | 0 (0)       | 0 (0)       | 0 (0)       |
| P3-12                   |          |             |              |             |               |             |             |             |
| Mean (SD)               | NA       | 6.80 (4.32) | 4.57 (2.76)  | 5.50 (3.50) | 0.556 (1.67)  | 5.42 (3.90) | 3.55 (4.01) | 3.41 (3.90) |
| Median                  | NA       | 9.00        | 3.00         | 5.50        | 0             | 6.50        | 1.00        | 1.00        |
| (min, max)              |          | (0, 10.0)   | (2.00, 9.00) | (0, 10.0)   | (0, 5.00)     | (0, 10.0)   | (0, 10.0)   | (0, 10.0)   |

| Item <sup>a</sup>       | Pre-test |              |              |              | Main analysis |             |              |             |
|-------------------------|----------|--------------|--------------|--------------|---------------|-------------|--------------|-------------|
|                         | GD1      | GD2          | GD3          | Overall      | GD1           | GD2         | GD3          | Overall     |
|                         | (N=3)    | (N=6)        | (N=7)        | (N=16)       | (N=9)         | (N=13)      | (N=11)       | (N=33)      |
| Not collected,<br>n (%) | 3 (100)  | 1 (16.7)     | 0 (0)        | 4 (25.0)     | 0 (0)         | 1 (7.7)     | 0 (0)        | 1 (3.0)     |
| P3-13                   |          |              |              |              |               |             |              |             |
| Mean (SD)               | NA       | 6.50 (2.38)  | 5.50 (3.67)  | 5.90 (3.11)  | 5.11 (3.02)   | 5.54 (3.89) | 5.73 (3.50)  | 5.48 (3.44) |
| Median                  | NA       | 7.50         | 4.50         | 6.00         | 5.00          | 7.00        | 6.00         | 6.00        |
| (min, max)              |          | (3.00, 8.00) | (2.00, 10.0) | (2.00, 10.0) | (1.00, 10.0)  | (0, 10.0)   | (1.00, 10.0) | (0, 10.0)   |
| Not collected,<br>n (%) | 3 (100)  | 2 (33.3)     | 1 (14.3)     | 6 (37.5)     | 0 (0)         | 0 (0)       | 0 (0)        | 0 (0)       |
| P3-14                   |          |              |              |              |               |             |              |             |
| Mean (SD)               | NA       | 9.00 (1.41)  | 1.75 (2.36)  | 5.78 (4.21)  | 1.89 (1.83)   | 5.85 (4.14) | 2.36 (2.46)  | 3.61 (3.54) |
| Median                  | NA       | 10.0         | 1.00         | 7.00         | 2.00          | 7.00        | 1.00         | 3.00        |
| (min, max)              |          | (7.00, 10.0) | (0, 5.00)    | (0, 10.0)    | (0, 5.00)     | (0, 10.0)   | (0, 6.00)    | (0, 10.0)   |

| Item <sup>a</sup>       | Pre-test |             |             |             | Main analysis |             |             |             |
|-------------------------|----------|-------------|-------------|-------------|---------------|-------------|-------------|-------------|
|                         | GD1      | GD2         | GD3         | Overall     | GD1           | GD2         | GD3         | Overall     |
|                         | (N=3)    | (N=6)       | (N=7)       | (N=16)      | (N=9)         | (N=13)      | (N=11)      | (N=33)      |
| Not collected,<br>n (%) | 3 (100)  | 1 (16.7)    | 3 (42.9)    | 7 (43.8)    | 0 (0)         | 0 (0)       | 0 (0)       | 0 (0)       |
| P3-15                   |          |             |             |             |               |             |             |             |
| Mean (SD)               | NA       | 4.60 (4.22) | 3.50 (3.11) | 4.11 (3.59) | 1.78 (1.92)   | 4.54 (3.93) | 3.09 (3.70) | 3.30 (3.50) |
| Median                  | NA       | 3.00        | 3.50        | 3.00        | 2.00          | 6.00        | 1.00        | 2.00        |
| (min, max)              |          | (0, 10.0)   | (0, 7.00)   | (0, 10.0)   | (0, 5.00)     | (0, 10.0)   | (0, 10.0)   | (0, 10.0)   |
| Not collected,<br>n (%) | 3 (100)  | 1 (16.7)    | 3 (42.9)    | 7 (43.8)    | 0 (0)         | 0 (0)       | 0 (0)       | 0 (0)       |
| P3-16                   |          |             |             |             |               |             |             |             |
| Mean (SD)               | NA       | 1.00 (1.41) | 3.00 (2.31) | 2.17 (2.17) | 3.14 (3.76)   | 2.25 (2.09) | 4.60 (3.31) | 3.28 (3.06) |
| Median                  | NA       | 0           | 3.00        | 2.50        | 2.00          | 2.00        | 5.00        | 2.00        |
| (min, max)              |          | (0, 3.00)   | (0, 6.00)   | (0, 6.00)   | (0, 10.0)     | (0, 6.00)   | (0, 10.0)   | (0, 10.0)   |

| Item <sup>a</sup>       | Pre-test     |              |              |                   | Main analysis |               |               |                   |
|-------------------------|--------------|--------------|--------------|-------------------|---------------|---------------|---------------|-------------------|
|                         | GD1<br>(N=3) | GD2<br>(N=6) | GD3<br>(N=7) | Overall<br>(N=16) | GD1<br>(N=9)  | GD2<br>(N=13) | GD3<br>(N=11) | Overall<br>(N=33) |
| Not collected,<br>n (%) | 3 (100)      | 1 (16.7)     | 0 (0)        | 4 (25.0)          | 2 (22.2)      | 1 (7.7)       | 1 (9.1)       | 4 (12.1)          |

<sup>a</sup>Item numbers refer to the final questionnaire used in the main survey

<sup>b</sup>In Part 3, Item 3 (“Over the past week, have you had any difficulty swallowing food or speaking?”) in the pre-test was split into two items in the main survey (P3-3: “Over the past week, have you had any difficulty swallowing food?”; P3-4: “Over the past week, have you had any difficulty speaking?”).

GD1/2/3: type 1/2/3 Gaucher disease; max: maximum; min: minimum; NA: not applicable; P: Part; PROM: patient-reported outcome measure;

SD: standard deviation
